# Supplementary material for: Pseudidiomarina fusca sp. nov., Isolated from the Surface Seawater of the Western Pacific Ocean
Source: MDPI journal article supplement (doi:10.3390/microorganisms12020408), 2024-02-18

---

## Supplementary Materials

### ***Pseudidiomarina fusca* sp. nov., Isolated from Surface Seawater of the Western Pacific Ocean**

**Yaru Wang<sup>1,2,3</sup>, Xiaolei Wang<sup>1,2,3</sup>, Xueyu Gao<sup>1,2,3</sup>, Jingjing He<sup>1,2,3</sup>, Xiaoyu Yang<sup>1,2,3</sup>, Yunxiao Zhang<sup>1,2,3</sup>, Xiao-Hua Zhang<sup>1,2,3</sup> and Xiaochong Shi<sup>1,2,3\*</sup>**

<sup>1</sup>Frontiers Science Center for Deep Ocean Multispheres and Earth System, and College of Marine Life Sciences, Ocean University of China, Qingdao 266003, P. R. China

<sup>2</sup>Laboratory for Marine Ecology and Environmental Science, Laoshan Laboratory, Qingdao 266237, P. R. China

<sup>3</sup>Institute of Evolution & Marine Biodiversity, Ocean University of China, Qingdao 266003, P. R. China

#### **\*Author for Correspondence:**

Xiaochong Shi, College of Marine Life Sciences, Ocean University of China, 5 Yushan Road, Qingdao 266003, P. R China, Tel/Fax: +86-532-82032721, Email: shixiaochong@ouc.edu.cn

Subject category: New taxa–*Proteobacteria*

Running title: *Pseudidiomarina fusca* sp. nov.

**Table S1.** Genome features of strain GXY010<sup>T</sup> and strains of the genus *Pseudidiomarina*.

| Strains                                          | Genome size (Mb) | G+C content (%) | rRNA | tRNA | Contig No. | Contig N50 (bp) | Genbank accession No. |
|--------------------------------------------------|------------------|-----------------|------|------|------------|-----------------|-----------------------|
| <i>Pseudidiomarina fusca</i> GXY010 <sup>T</sup> | 2.80             | 48.0            | 3    | 71   | 117        | 129,818         | PRJNA860053           |
| <i>P. tainanensis</i> PIN1 <sup>T</sup>          | 2.37             | 47.4            | 7    | 49   | 5          | 1,762,872       | PRJNA420138           |
| <i>P. taiwanensis</i> PIT1 <sup>T</sup>          | 2.20             | 49.3            | 11   | 49   | 7          | 591,787         | PRJNA420139           |
| <i>P. marina</i> PIM1 <sup>T</sup>               | 2.41             | 47.2            | 7    | 52   | 10         | 595,684         | PRJNA420132           |
| <i>P. sediminum</i> c121 <sup>T</sup>            | 2.67             | 50.3            | 6    | 53   | 7          | 1,473,225       | PRJNA420136           |
| <i>P. homiensis</i> PO-M2 <sup>T</sup>           | 2.61             | 50.0            | 6    | 50   | 6          | 1,900,389       | PRJNA420126           |
| <i>P. mangrovi</i> ZQ330 <sup>T</sup>            | 2.50             | 51.0            | 3    | 45   | 22         | 343,341         | PRJNA504364           |
| <i>P. gelatinasegens</i> R04H25 <sup>T</sup>     | 2.47             | 48.2            | 4    | 52   | 30         | 378,411         | PRJNA504716           |
| <i>P. aquimaris</i> SW15 <sup>T</sup>            | 2.80             | 50.2            | 11   | 50   | 22         | 254,670         | PRJNA419972           |
| <i>P. halophila</i> BH195 <sup>T</sup>           | 2.62             | 50.6            | 4    | 49   | 10         | 656,066         | PRJNA420125           |
| <i>P. insulisalae</i> CVS-6 <sup>T</sup>         | 2.56             | 52.3            | 8    | 51   | 19         | 207,837         | PRJNA420127           |
| <i>P. aestuarii</i> KYW314 <sup>T</sup>          | 2.64             | 49.1            | 3    | 49   | 12         | 1,928,469       | PRJNA419973           |
| <i>P. planktonica</i> CGMCC 1.12458 <sup>T</sup> | 2.57             | 49.0            | 3    | 51   | 6          | 1,833,841       | PRJNA370089           |
| <i>P. atlantica</i> MCCC 1A10513 <sup>T</sup>    | 2.70             | 50.2            | 4    | 52   | 49         | 250,685         | PRJNA253896           |
| <i>P. donghaiensis</i> 908033 <sup>T</sup>       | 2.57             | 48.1            | 3    | 49   | 15         | 334,465         | PRJNA419975           |
| <i>P. indica</i> CGMCC 1.10824 <sup>T</sup>      | 2.20             | 49.5            | 12   | 47   | 32         | 139,063         | PRJNA255599           |
| <i>P. salinarum</i> ISL-52 <sup>T</sup>          | 2.48             | 53.0            | 4    | 51   | 5          | 1,814,714       | PRJNA420135           |
| <i>P. andamanensis</i> W-5 <sup>T</sup>          | 2.40             | 47.0            | 12   | 56   | 1          | 2,414,243       | PRJNA490609           |
| <i>P. woesei</i> DSM 27808 <sup>T</sup>          | 2.44             | 47.8            | 7    | 48   | 17         | 317,631         | PRJNA288988           |

---

**Figure S1** Transmission electron micrograph of a negatively stained cell of GXY010<sup>T</sup>. Bar, 500 nm

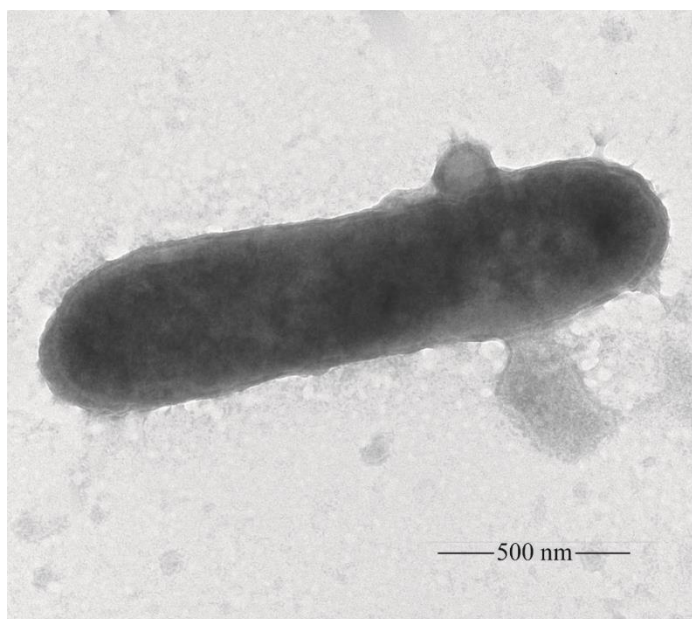

**Figure S2** Maximum-likelihood phylogenetic tree based on 16S rRNA gene sequences (1,505 bp) showing the phylogenetic position of strain GXY010<sup>T</sup> and other closely related species. Percentage bootstrap values above 50% (1,000 replicates) are shown at branch nodes. *Escherichia coli* ATCC 11775<sup>T</sup> (GenBank accession: AB681728) was used as the outgroup.

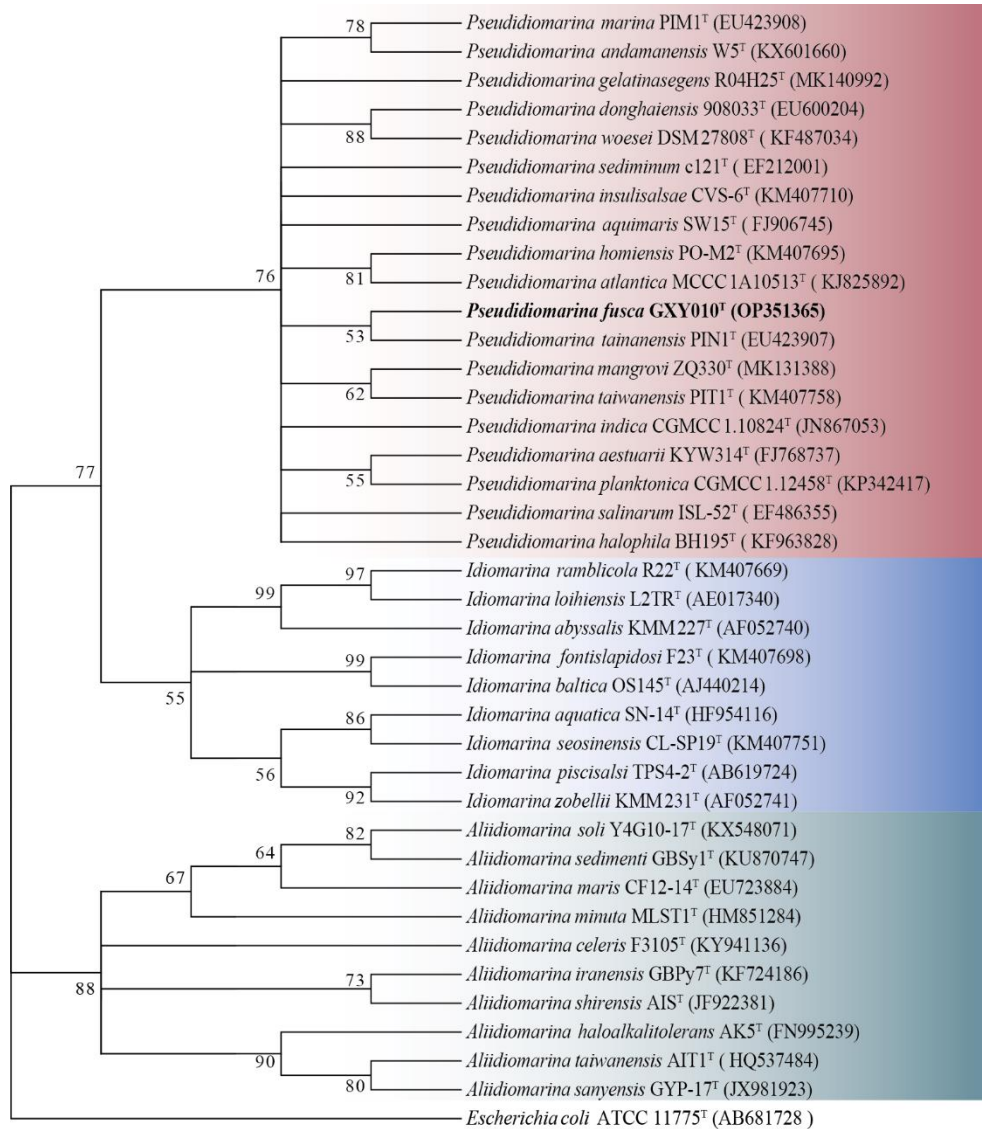

**Figure S3** Maximum-parsimony phylogenetic tree based on 16S rRNA gene sequences (1,505 bp) showing the phylogenetic positions of strain GXY010<sup>T</sup> and other closely related species. Percent bootstrap values above 50% (1,000 replicates) are shown at branch nodes. *Escherichia coli* ATCC 11775<sup>T</sup> (GenBank accession: AB681728) was used as the outgroup.

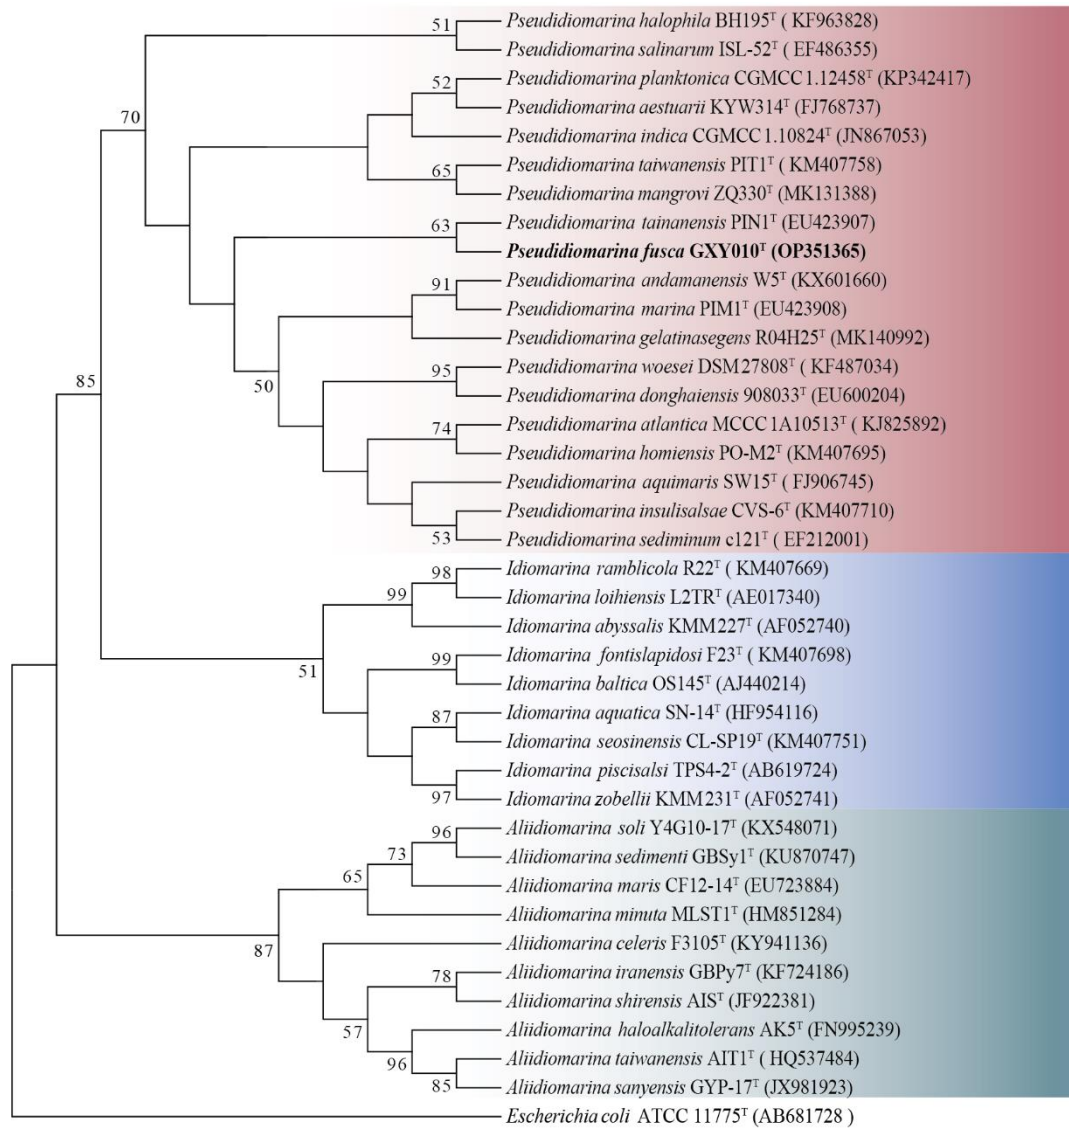

**Figure S4.** Comparison of gene content between GXY010<sup>T</sup> and their reference strains. Relative abundance compared to all COG categories of the orthologous and specific genes in each strain. COG functional categories are described as follows: A, RNA processing and modification; B, Chromatin structure and dynamics; C, Energy production and conversion; D, Cell cycle control, cell division, chromosome partitioning; E, Amino acid transport and metabolism; F, Nucleotide transport and metabolism; G, Carbohydrate transport and metabolism; H, Coenzyme transport and metabolism; I, Lipid transport and metabolism; J, Translation, ribosomal structure and biogenesis; K, Transcription; L, Replication, recombination and repair; M, Cell wall/membrane/envelope biogenesis; N, Cell motility; O, Posttranslational modification, protein turnover, chaperones; P, Inorganic ion transport and metabolism; Q, Secondary metabolites biosynthesis, transport and catabolism; R, General function prediction only; S, Function unknown; T, Signal transduction mechanisms; U, Intracellular trafficking, secretion, and vesicular transport; V, Defense mechanisms; W, Extracellular structures; Z, Cytoskeleton.

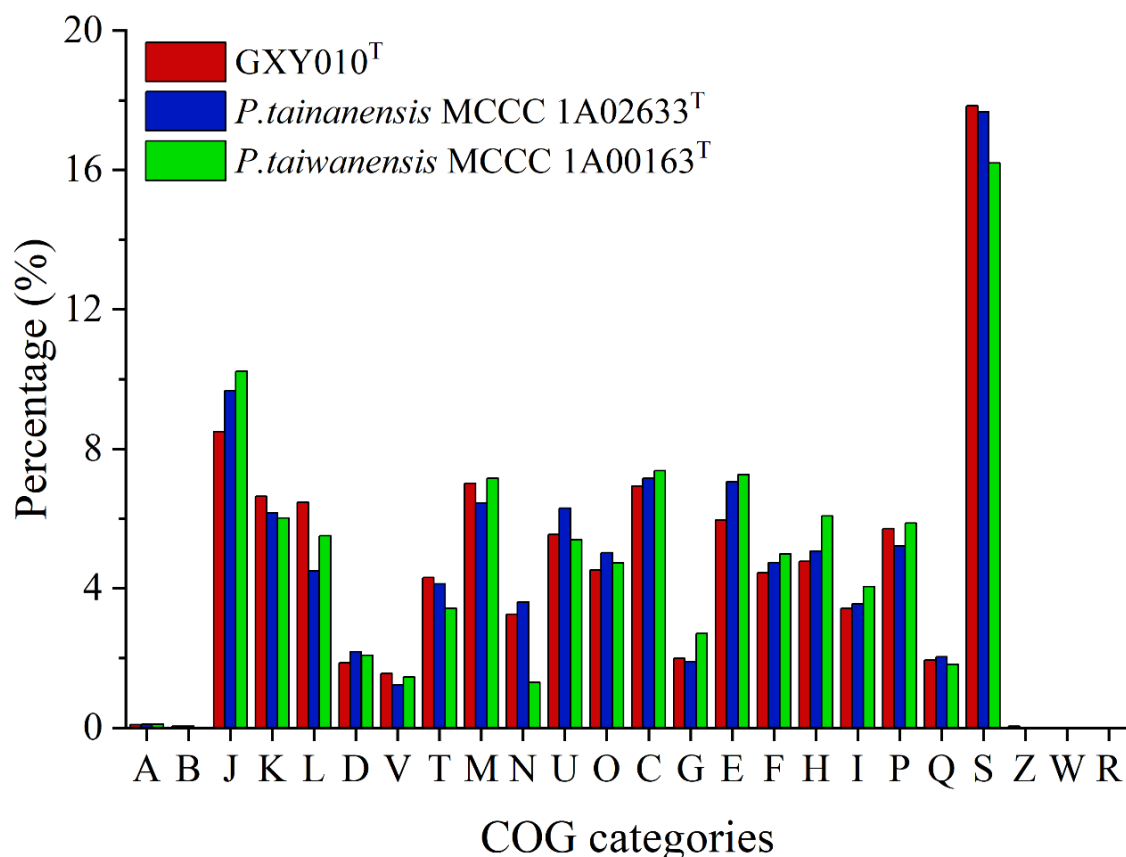

**Figure S5** Total polar lipids of strain GXY010<sup>T</sup> and the reference strain were separated by two-dimensional TLC and detected with 10% ethanolic molybdophosphoric acid. PE, phosphatidylethanolamine; PG, phosphatidylglycerol; DPG, diphosphatidylglycerol; GL, unidentified glycolipid; AL, unidentified aminolipids.

Strains: a. GXY010<sup>T</sup>; b. *P. tainanensis* MCCC 1A02633<sup>T</sup>; c. *P. taiwanensis* MCCC 1A00163<sup>T</sup>

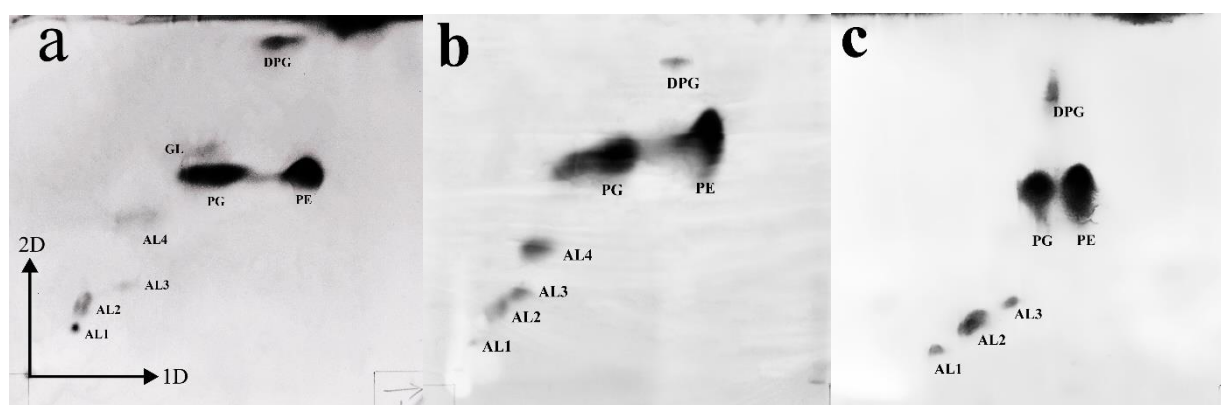

Supplement: s1 [file s1]
